# Supplementary material for: Simultaneous determination of the oxygen isotope ratio and volatile composition of apatite with high lateral resolution via nano-secondary-ion mass spectrometry
Source: Royal Society of Chemistry journal article supplement (doi:10.1039/d4ja00183d), 2024-01-01
Supplement: d4ja00183d1.xlsx [file d4ja00183d1.xlsx]

## Sheet: Result
Filename	18O/16O Ratio	18O/16O Err Mean（RSE%)	16O1H/16O Ratio	16O1H/16O Err Mean （RSE%)	19F/16O Ratio	19F/16O Err Mean （RSE%)	32S/16O Ratio	32S/16O Err Mean（RSE%)	19F16O/16O Ratio	19F16O/16O Err Mean（RSE%)	37Cl/16O Ratio	37Cl/16O Err Mean（RSE%)	RAW18O	SE	αIMF	Ture18O	SD	average18O	2SD	H2O%	SE	H2O%aver	SD	35F%	SD	35F%aver	SD	Recalculte35F%	SD	35F%aver	SD	32S%	SD	32Saverage	SD
441a@1	0.00204305	0.0248	0.00222326	0.0414	0.0788084	0.0276	0.0017231	0.0374	0.00051958	0.0541	0.00503398	0.0228	18.8759	0.248		7.62986	0.352851	7.91	0.501994	0.523952	0.0360689	0.515101	0.00408781	2.44803	0.133773	2.43642	0.00654001	2.1812	0.132628	2.17087	0.00582718	0.162526	0.0124284	0.162479	0.000785494
441a@2	0.00204368	0.0237	0.00220959	0.0444	0.0786052	0.0285	0.00174574	0.0738	0.000517555	0.0549	0.0050236	0.0273	19.1901	0.237		7.94058	0.345208			0.515013	0.0364037			2.43848	0.135183			2.1727	0.134059			0.164662	0.0163798
441a@3	0.00204441	0.023	0.00221525	0.0426	0.0786692	0.0295	0.00172267	0.0427	0.000517454	0.0594	0.00502435	0.0244	19.5542	0.23		8.30061	0.34044			0.516914	0.0359609			2.43801	0.146029			2.17228	0.14499			0.162486	0.0128684
441a@4	0.00204433	0.023	0.00219381	0.0381	0.0784321	0.0281	0.00171477	0.0372	0.000515799	0.0579	0.00501415	0.0229	19.5143	0.23		8.26116	0.34044			0.509714	0.0341037			2.43021	0.141948			2.16533	0.140886			0.161741	0.0123525
441a@5	0.00204343	0.0241	0.00221062	0.0401	0.0785861	0.0278	0.00171948	0.0374	0.000516215	0.0534	0.00501475	0.0239	19.0654	0.241	1.01116	7.81728	0.347966			0.515359	0.0350786			2.43217	0.131221			2.16708	0.130069			0.162185	0.0124023
441a@6	0.00204293	0.0223	0.00220381	0.0379	0.078477	0.0282	0.00172037	0.0362	0.000516476	0.0541	0.00501693	0.0245	18.8161	0.223	0.250997	7.57068	0.335751			0.513072	0.0342701			2.4334	0.132974			2.16817	0.131836			0.162269	0.0123146
441a@7	0.00204343	0.0242	0.00219581	0.036	0.0784305	0.0276	0.00171964	0.039	0.000515977	0.057	0.00501648	0.0241	19.0654	0.242		7.81728	0.34866			0.510386	0.0335499			2.43105	0.139828			2.16608	0.138749			0.1622	0.0125324
441a@8	0.00204426	0.0233	0.00222403	0.0421	0.0787767	0.0286	0.00172594	0.0373	0.000519679	0.0594	0.00503143	0.0257	19.4794	0.233		8.22663	0.342474			0.519863	0.0360074			2.44849	0.146657			2.18162	0.145614			0.162794	0.0124409
441a@9	0.00204339	0.0222	0.00220223	0.0362	0.0785148	0.0275	0.00171602	0.0385	0.00051574	0.0584	0.00500331	0.0241	19.0455	0.222		7.79755	0.335087			0.512542	0.0337478			2.42993	0.143136			2.16508	0.142083			0.161858	0.0124653
441a@10	0.00204327	0.0241	0.00220716	0.0384	0.0785854	0.0287	0.00171829	0.0388	0.000516699	0.0543	0.0050149	0.0232	18.9856	0.241		7.73837	0.347966			0.514197	0.0344917			2.43445	0.133513			2.16911	0.132379			0.162073	0.0125062
648@1	0.00203883	0.0274	0.0010918	0.0661	0.00509848	0.207	0.00109781	0.0437	3.27228e-05	0.208	0.0332161	0.0144	16.7714	0.274		5.54856	0.371585	5.08348	0.710248	0.139643	0.0120078	0.135049	0.00309831	0.154175	0.0320904	0.149446	0.0026671	0.137371	0.0320715	0.133157	0.0023764	0.103548	0.00825696	0.107306	0.00333534
648@2	0.00203922	0.0253	0.00108698	0.0622	0.00487148	0.196	0.00110636	0.0546	3.11335e-05	0.221	0.0332283	0.0133	16.9659	0.253		5.74091	0.356383			0.138024	0.01146			0.146687	0.0324375			0.130699	0.0324206			0.104354	0.00899509
648@3	0.00203782	0.028	0.00107846	0.0616	0.00496497	0.212	0.00109749	0.0453	3.15696e-05	0.216	0.0330313	0.0105	16.2677	0.28		5.05043	0.376031			0.135163	0.0111618			0.148742	0.0321486			0.13253	0.0321311			0.103517	0.00834647
648@4	0.00203795	0.0244	0.00107991	0.0654	0.00493454	0.21	0.0010936	0.0403	3.12207e-05	0.215	0.0331571	0.0137	16.3325	0.244		5.11455	0.350051			0.13565	0.0115917			0.147098	0.0316463			0.131065	0.0316289			0.103151	0.00803845
648@5	0.00203636	0.0232	0.00107511	0.0581	0.00489166	0.199	0.00114189	0.0456	3.13973e-05	0.199	0.0331519	0.0133	15.5396	0.232		4.33036	0.341795			0.134038	0.0107236			0.14793	0.0294601			0.131806	0.0294412			0.107705	0.00870233
648@6	0.0020377	0.0257	0.00107478	0.0655	0.00499666	0.186	0.00115584	0.0404	3.15512e-05	0.2	0.0329496	0.0123	16.2079	0.257		4.99125	0.359233			0.133927	0.0114547			0.148655	0.029753			0.132452	0.0297341			0.109021	0.00850159
648@7	0.00203788	0.0259	0.00106727	0.0692	0.00499341	0.192	0.00113965	0.0514	3.13094e-05	0.195	0.0329447	0.0145	16.2976	0.259		5.08003	0.360667			0.131405	0.0116155			0.147516	0.028788			0.131437	0.0287687			0.107494	0.00905177
648@8	0.0020377	0.0251	0.00107176	0.0657	0.00513999	0.214	0.00116676	0.0339	3.24816e-05	0.205	0.0327927	0.0145	16.2079	0.251		4.99125	0.354965			0.132913	0.0113883			0.153039	0.031395			0.136358	0.031376			0.110051	0.00823408
648@9	0.00203756	0.0243	0.00109177	0.0568	0.00516894	0.196	0.00118762	0.0681	3.24657e-05	0.204	0.0329129	0.0122	16.138	0.243		4.9222	0.349354			0.139633	0.01104			0.152964	0.0312268			0.136291	0.0312077			0.112019	0.010678
648@10	0.00203785	0.0255	0.00106337	0.0712	0.00496474	0.196	0.00118949	0.0438	3.13384e-05	0.193	0.0328751	0.0141	16.2827	0.255		5.06523	0.357805			0.130096	0.0117046			0.147652	0.0285196			0.131559	0.0285001			0.112195	0.00895267
37@1	0.00206459	0.0235	0.00134828	0.0578	0.117017	0.0253	0.00251017	0.0493	0.000740977	0.0516	0.00121947	0.0379	29.618	0.235		18.2534	0.343838	18.0526	0.354885	0.225773	0.0180135	0.229339	0.00279084	3.49115	0.182138	3.50281	0.0113738	3.11063	0.180428	3.12102	0.0101341	0.236764	0.0196377	0.262688	0.0184417
37@2	0.00206411	0.0238	0.00136007	0.0603	0.11727	0.025	0.00256062	0.0617	0.000740607	0.0521	0.00124175	0.0427	29.3786	0.238		18.0166	0.345895			0.229732	0.0187497			3.4894	0.183773			3.10908	0.182079			0.241523	0.0219451
37@3	0.00206397	0.0221	0.0013486	0.0559	0.116913	0.0231	0.00260647	0.0326	0.00074055	0.05	0.0012611	0.0421	29.3088	0.221		17.9476	0.334426			0.22588	0.0177137			3.48914	0.176513			3.10884	0.17475			0.245847	0.0182518
37@4	0.0020645	0.0242	0.00135458	0.055	0.117124	0.0242	0.00264776	0.0303	0.000741954	0.0504	0.00125637	0.0371	29.5731	0.242		18.209	0.34866			0.227888	0.0177255			3.49575	0.17823			3.11473	0.176477			0.249742	0.018296
37@5	0.0020645	0.0233	0.00136145	0.0544	0.117371	0.0258	0.00280495	0.0361	0.000743569	0.0528	0.00125806	0.0388	29.5731	0.233		18.209	0.342474			0.230195	0.0178076			3.50336	0.186934			3.12151	0.185256			0.264568	0.0200656
37@6	0.00206386	0.023	0.0013515	0.0558	0.11701	0.0243	0.00291429	0.0341	0.000744486	0.0479	0.00126138	0.0395	29.2539	0.23		17.8933	0.34044			0.226854	0.0177739			3.50768	0.170175			3.12536	0.168326			0.274882	0.0205917
37@7	0.0020644	0.0243	0.00136407	0.0519	0.117432	0.0236	0.00280293	0.0354	0.000745006	0.046	0.00124415	0.0364	29.5232	0.243		18.1597	0.349354			0.231075	0.0174742			3.51013	0.163713			3.12755	0.161787			0.264378	0.0199637
37@8	0.00206459	0.0247	0.00136335	0.0519	0.117123	0.0237	0.00314976	0.0392	0.000743372	0.0511	0.00126724	0.0441	29.618	0.247		18.2534	0.352148			0.230833	0.017456			3.50243	0.180995			3.12069	0.179262			0.297092	0.0229849
37@9	0.00206369	0.0238	0.00135968	0.0628	0.117242	0.0229	0.00301351	0.0373	0.000745454	0.0513	0.00124606	0.0372	29.1692	0.238		17.8095	0.345895			0.229601	0.019167			3.51224	0.182196			3.12943	0.180466			0.28424	0.0217219
37@10	0.00206362	0.0218	0.00137743	0.0525	0.117676	0.0225	0.00283965	0.0255	0.000748539	0.0494	0.00126439	0.0379	29.1343	0.218		17.775	0.332451			0.235562	0.0179108			3.52678	0.176326			3.14238	0.174523			0.267841	0.0191261
38@1	0.00204612	0.0229	0.00186531	0.0468	0.0242962	0.0383	0.00123585	0.0565	0.000153212	0.0993	0.0217565	0.0226	20.4069	0.229		9.14398	0.339765	9.56567	1.09065	0.399399	0.0288433	0.398417	0.00316089	0.721866	0.0718964	0.707161	0.00915281	0.643186	0.0717118	0.630084	0.00815521	0.116568	0.0101896	0.115339	0.00216772
38@2	0.00204893	0.024	0.00186357	0.0455	0.0237677	0.043	0.00121587	0.0727	0.000149856	0.0972	0.0221014	0.0218	21.8083	0.24		10.5299	0.347274			0.398815	0.0284678			0.706054	0.0688434			0.629097	0.0686589			0.114683	0.0113149
38@3	0.00204876	0.0262	0.00187515	0.0444	0.0238491	0.0447	0.00121246	0.0582	0.000151013	0.0911	0.0221159	0.0186	21.7235	0.262		10.446	0.362827			0.402703	0.0284651			0.711505	0.0650492			0.633955	0.0648509			0.114362	0.0101235
38@4	0.00204779	0.0249	0.00185182	0.0537	0.023618	0.0435	0.00117845	0.0789	0.000149225	0.0958	0.0222131	0.0194	21.2398	0.249		9.96763	0.353554			0.394869	0.0303528			0.703081	0.0675723			0.626449	0.067386			0.111154	0.0114839
38@5	0.00204668	0.0228	0.00188292	0.0453	0.0240955	0.0446	0.0011932	0.0742	0.000153046	0.0945	0.0220112	0.021	20.6862	0.228		9.42017	0.339092			0.405313	0.02888			0.721083	0.0683682			0.642489	0.0681745			0.112545	0.0112289
38@6	0.00204719	0.0248	0.00185878	0.0481	0.023097	0.0486	0.00124688	0.0514	0.000146313	0.0959	0.0224046	0.0214	20.9406	0.248		9.67171	0.352851			0.397206	0.0290222			0.689361	0.0663224			0.614224	0.0661399			0.117608	0.00990346
38@7	0.00204662	0.0227	0.00186143	0.0489	0.0235219	0.0444	0.00125434	0.077	0.000149203	0.096	0.022174	0.0219	20.6563	0.227		9.39058	0.338421			0.398096	0.0292978			0.702977	0.0677025			0.626356	0.0675166			0.118312	0.0120527
38@8	0.00204594	0.0225	0.00185541	0.0488	0.0234626	0.0418	0.0012236	0.0569	0.000148783	0.0929	0.0222131	0.022	20.3172	0.225		9.05521	0.337082			0.396075	0.0291228			0.700998	0.065346			0.624593	0.0651544			0.115412	0.0101185
38@9	0.00204581	0.0249	0.00185469	0.052	0.0236768	0.0434	0.00122163	0.0418	0.000150776	0.0956	0.022145	0.0205	20.2523	0.249		8.99109	0.353554			0.395833	0.0299606			0.710388	0.068133			0.63296	0.0679443			0.115227	0.00907012
38@10	0.00204591	0.0248	0.00185477	0.0463	0.0237587	0.0462	0.00124597	0.051	0.000149484	0.0945	0.021918	0.0187	20.3022	0.248		9.04041	0.352851			0.39586	0.0284598			0.704301	0.066777			0.627536	0.0665878			0.117522	0.00986761
40@1	0.00204817	0.0244	0.0024229	0.047	0.0669975	0.0273	0.001008	0.0428	0.000432454	0.0596	0.00712051	0.0239	21.4293	0.244		10.155	0.350051	9.14842	0.756233	0.586646	0.0424417	0.581492	0.0115649	2.03753	0.122446	1.99862	0.0313941	1.81545	0.12158	1.78078	0.0279723	0.0950766	0.00753492	0.0948616	0.00437538
40@2	0.00204581	0.0235	0.00238687	0.0434	0.0665339	0.0249	0.0010042	0.0592	0.000426441	0.0612	0.00708027	0.0223	20.2523	0.235		8.99109	0.343838			0.574547	0.0402534			2.0092	0.123932			1.7902	0.123101			0.0947182	0.00844721
40@3	0.00204638	0.0244	0.00236945	0.0454	0.0659422	0.0238	0.000987785	0.177	0.000421629	0.056	0.00712857	0.0265	20.5366	0.244		9.27222	0.350051			0.568697	0.0405579			1.98652	0.112292			1.77	0.111394			0.0931699	0.0176231
40@4	0.00204628	0.0242	0.00240791	0.0499	0.066388	0.0245	0.00103178	0.329	0.00042502	0.0581	0.00712892	0.0241	20.4867	0.242		9.2229	0.34866			0.581612	0.0431923			2.0025	0.117363			1.78424	0.11649			0.0973196	0.0326695
40@5	0.00204564	0.0259	0.00237644	0.0444	0.0659038	0.0241	0.00105158	0.0467	0.00042098	0.0599	0.0071656	0.0214	20.1676	0.259		8.90725	0.360667			0.571044	0.0403642			1.98347	0.119787			1.76728	0.118949			0.0991871	0.00807616
40@6	0.00204527	0.0232	0.00250044	0.063	0.0637227	0.0188	0.000915981	0.0657	0.00040694	0.0534	0.00664783	0.0179	19.983	0.232		8.72476	0.341795			0.612685	0.051239			1.91732	0.103444			1.70834	0.102536			0.0863972	0.00808881
40@7	0.00204562	0.0255	0.00240653	0.0435	0.066167	0.0242	0.0010557	0.0428	0.000424907	0.0579	0.00712666	0.0217	20.1576	0.255		8.89738	0.357805			0.581149	0.040752			2.00197	0.116935			1.78377	0.116059			0.0995757	0.00789148
40@8	0.00204625	0.0242	0.00239632	0.0495	0.0663496	0.0246	0.00100598	0.0544	0.000428458	0.0597	0.00709809	0.0221	20.4718	0.242		9.2081	0.34866			0.57772	0.0427484			2.0187	0.121515			1.79867	0.120658			0.094886	0.00816695
40@9	0.00204562	0.0254	0.0024049	0.0427	0.0667355	0.0232	0.000935895	0.0522	0.00043021	0.0585	0.00707608	0.0216	20.1576	0.254		8.89738	0.357093			0.580601	0.0404271			2.02695	0.1196			1.80603	0.118722			0.0882755	0.00747675
40@10	0.00204625	0.0252	0.00240376	0.0446	0.0660031	0.0234	0.00106031	0.0518	0.000424926	0.0599	0.00721607	0.0224	20.4718	0.252		9.2081	0.355673			0.580219	0.0410857			2.00206	0.12091			1.78384	0.120064			0.100011	0.00844609
AP1@1	0.00204863	0.0248	0.00108578	0.0593	0.124802	0.0248	0.00543386	0.0189	0.000801249	0.0472	0.00133955	0.0341	21.6587	0.248		10.3819	0.352851	10.74	0.603288	0.137621	0.0111307	0.138366	0.003165	3.77512	0.180541	3.76483	0.0129297	3.36365	0.178522	3.35449	0.0115204	0.512533	0.0355319	0.482846	0.0148816
AP1@2	0.00204939	0.0238	0.00109928	0.061	0.124917	0.0262	0.00516183	0.0174	0.000802336	0.0494	0.001343	0.0389	22.0377	0.238		10.7567	0.345895			0.142155	0.0116757			3.78024	0.188999			3.36822	0.187066			0.486874	0.0335613
AP1@3	0.00204921	0.0246	0.00107466	0.063	0.123947	0.0248	0.00507398	0.0246	0.00079819	0.0465	0.0013562	0.0385	21.9479	0.246		10.668	0.351448			0.133887	0.011197			3.76071	0.177254			3.35081	0.175213			0.478588	0.0340237
AP1@4	0.00204947	0.0239	0.00109705	0.0599	0.124948	0.0259	0.00521551	0.0289	0.000802141	0.0471	0.00133482	0.0416	22.0776	0.239		10.7962	0.346584			0.141406	0.0114992			3.77932	0.180369			3.3674	0.178343			0.491937	0.0357598
AP1@5	0.00204953	0.0233	0.00108655	0.0603	0.12429	0.0257	0.00519384	0.0325	0.000797743	0.0497	0.00136213	0.0435	22.1075	0.233		10.8258	0.342474			0.13788	0.0112531			3.7586	0.189031			3.34894	0.18712			0.489893	0.0363484
AP1@6	0.00204981	0.0243	0.00107667	0.0573	0.123583	0.0259	0.00527583	0.0421	0.000794417	0.0478	0.00137992	0.0393	22.2472	0.243		10.9639	0.349354			0.134562	0.0106875			3.74293	0.181219			3.33497	0.179241			0.497627	0.0392504
AP1@7	0.00205029	0.0245	0.00109765	0.0608	0.125022	0.0247	0.0049155	0.0249	0.000800199	0.0453	0.00134656	0.0352	22.4865	0.245		11.2006	0.350748			0.141607	0.0116098			3.77018	0.173239			3.35925	0.171139			0.46364	0.0330094
AP1@8	0.00204975	0.0238	0.00107664	0.064	0.123822	0.0249	0.00499412	0.0243	0.000796241	0.0459	0.00138145	0.0378	22.2172	0.238		10.9343	0.345895			0.134552	0.0113543			3.75153	0.174601			3.34263	0.172538			0.471055	0.0334396
AP1@9	0.0020495	0.025	0.00108591	0.0591	0.124008	0.025	0.00494112	0.0173	0.000796154	0.0495	0.00131977	0.0374	22.0926	0.25		10.811	0.354259			0.137665	0.0111141			3.75112	0.187913			3.34227	0.185999			0.466056	0.0321146
AP1@10	0.00204798	0.0245	0.0010998	0.0619	0.124655	0.0236	0.0049857	0.017	0.000801985	0.0486	0.00134425	0.0325	21.3345	0.245		10.0613	0.350748			0.142329	0.0117855			3.77859	0.18593			3.36674	0.183966			0.470261	0.0323692
AP2@1	0.0020434	0.0235	0.00116574	0.0573	0.125542	0.0235	0.00504949	0.0253	0.000809535	0.0431	0.00139281	0.0358	19.0505	0.235		7.80248	0.343838	8.54129	1.14259	0.164473	0.0130632	0.163137	0.00377027	3.81416	0.166993	3.82029	0.0438095	3.39844	0.164762	3.4039	0.0390345	0.476278	0.0339763	0.468328	0.0144186
AP2@2	0.00204452	0.0254	0.00114755	0.0582	0.124738	0.0254	0.00509802	0.023	0.00080072	0.0503	0.00139059	0.0363	19.609	0.254		8.35487	0.357093			0.158365	0.0126813			3.77263	0.191974			3.36143	0.190078			0.480855	0.0339264
AP2@3	0.00204661	0.0248	0.00113981	0.0567	0.124679	0.0266	0.00495818	0.0252	0.00079971	0.0519	0.00135926	0.039	20.6513	0.248		9.38565	0.352851			0.155765	0.0123044			3.76787	0.197693			3.35719	0.195858			0.467665	0.0333453
AP2@4	0.00204377	0.0253	0.00116408	0.0567	0.125929	0.0269	0.00519027	0.0307	0.000812867	0.0514	0.00134697	0.0372	19.235	0.253		7.98497	0.356383			0.163916	0.0129482			3.82986	0.199051			3.41243	0.197168			0.489557	0.0359462
AP2@5	0.00204484	0.0245	0.00115508	0.0653	0.122088	0.028	0.00504502	0.0289	0.000793107	0.0464	0.00133407	0.0428	19.7686	0.245		8.51269	0.350748			0.160893	0.0137364			3.73676	0.175757			3.32947	0.173724			0.475856	0.0345909
AP2@6	0.00204407	0.0243	0.00117099	0.0545	0.126073	0.0267	0.00507819	0.0223	0.000818878	0.048	0.00137263	0.0382	19.3846	0.243		8.13293	0.349354			0.166236	0.0128715			3.85818	0.18756			3.43766	0.18553			0.478985	0.0336866
AP2@7	0.00204451	0.0252	0.00117644	0.0556	0.126122	0.0242	0.00488363	0.022	0.000819784	0.0455	0.00137574	0.0362	19.604	0.252		8.34993	0.355673			0.168066	0.013144			3.86245	0.17824			3.44146	0.176098			0.460634	0.0323524
AP2@8	0.0020453	0.0232	0.00116495	0.052	0.125522	0.0248	0.00478433	0.0218	0.000820094	0.0426	0.00139672	0.0351	19.998	0.232		8.73956	0.341795			0.164208	0.0124289			3.86391	0.16727			3.44277	0.164984			0.451268	0.0316664
AP2@9	0.00204466	0.0243	0.0011753	0.0566	0.125927	0.0271	0.00465415	0.0234	0.000819663	0.0485	0.00136042	0.0366	19.6788	0.243		8.42391	0.349354			0.167683	0.0132338			3.86188	0.189647			3.44096	0.187636			0.438989	0.0310302
AP2@10	0.0020473	0.0239	0.00115767	0.0587	0.125406	0.0272	0.00491071	0.0214	0.000813993	0.049	0.00136575	0.0356	20.9954	0.239		9.72596	0.346584			0.161763	0.0130123			3.83517	0.190229			3.41715	0.188252			0.463188	0.0324458
Durango@1	0.00204753	0.0253	0.000906962	0.0601	0.116408	0.0169	0.00225515	0.0309	0.000730829	0.0518	0.00194302	0.0293	21.1101	0.253		9.83939	0.356383	9.40538	0.455775	0.0775714	0.00631958	0.102266	0.0105706	3.44334	0.180325	3.49438	0.0301169	3.06803	0.178644	3.11351	0.0268343	0.21271	0.0156363	0.189711	0.0381211
Durango@2	0.00204613	0.0261	0.000990243	0.0626	0.115169	0.0175	0.00221609	0.0303	0.000732385	0.0482	0.00189083	0.0308	20.4119	0.261		9.14892	0.362106			0.105538	0.00879444			3.45067	0.168431			3.07456	0.166623			0.209026	0.0153132
Durango@3	0.00204647	0.0246	0.00101547	0.0596	0.116227	0.017	0.00201456	0.0359	0.000741069	0.0492	0.00183439	0.0313	20.5815	0.246		9.3166	0.351448			0.11401	0.00924618			3.49158	0.173877			3.11102	0.172084			0.190017	0.0143934
Durango@4	0.00204691	0.0246	0.000957422	0.0619	0.117008	0.0167	0.00228808	0.0344	0.000746706	0.0469	0.00191425	0.0323	20.8009	0.246		9.53361	0.351448			0.0945167	0.00782642			3.51814	0.16721			3.13468	0.165316			0.215816	0.0161966
Durango@5	0.00204647	0.0243	0.000951308	0.0634	0.117227	0.0168	0.00191058	0.0389	0.000749225	0.0478	0.00187624	0.0301	20.5815	0.243		9.3166	0.349354			0.0924635	0.00776063			3.53001	0.17091			3.14526	0.169045			0.18021	0.0139148
Durango@6	0.00204706	0.0241	0.00101299	0.0611	0.116898	0.0172	0.00162228	0.0384	0.000746181	0.0472	0.00177218	0.0302	20.8757	0.241		9.60759	0.347966			0.113177	0.00930411			3.51567	0.168133			3.13248	0.166252			0.153017	0.0117768
Durango@7	0.00204594	0.0266	0.000989299	0.0612	0.116483	0.0175	0.00167985	0.0377	0.000746195	0.0482	0.0017345	0.0291	20.3172	0.266		9.05521	0.365726			0.105221	0.0086579			3.51573	0.171607			3.13254	0.169765			0.158447	0.0121397
Durango@8	0.00204699	0.0242	0.00098886	0.065	0.116873	0.0175	0.001701	0.0347	0.000747357	0.0451	0.0017477	0.0323	20.8408	0.242		9.57307	0.34866			0.105074	0.00894673			3.52121	0.161104			3.13741	0.159134			0.160442	0.012063
Durango@9	0.00204675	0.025	0.000989093	0.0611	0.116362	0.0172	0.00150334	0.0399	0.000742006	0.0482	0.00186996	0.0299	20.7211	0.25		9.4547	0.354259			0.105152	0.00864439			3.496	0.170644			3.11495	0.168812			0.141798	0.011021
Durango@10	0.00204625	0.0238	0.00100333	0.0578	0.113942	0.0175	0.00292222	0.0277	0.000734686	0.0533	0.00242255	0.0288	20.4718	0.238		9.2081	0.345895			0.109933	0.00877116			3.46151	0.186414			3.08422	0.184771			0.27563	0.0199068

## Sheet: Background Evaluation of Volati
	Holder					silico grid
Time	16O1H	32S	19F16O	37Cl		16O1H	32S	19F16O	37Cl
0.54	17635	21778	3.6991	405.05		340.32	205.3	1.8496	11.097
1.08	17010	21560	5.5487	355.11		382.86	209	5.5487	18.496
1.62	17007	21753	5.5487	360.66		310.72	225.65	1.8496	9.2478
2.16	16805	21902	0	399.5		325.52	221.95	3.6991	20.345
2.7	17180	21568	7.3982	364.36		340.32	214.55	3.6991	22.195
3.24	16883	21630	11.097	329.22		334.77	184.96	1.8496	24.044
3.78	17177	21686	7.3982	338.47		349.56	266.34	5.5487	18.496
4.32	16964	21623	5.5487	319.97		325.52	201.6	5.5487	22.195
4.86	17081	22041	12.947	297.78		371.76	233.04	1.8496	11.097
5.4	17031	21895	5.5487	310.72		373.61	205.3	0	14.796
5.94	17260	21706	12.947	362.51		342.17	183.11	5.5487	9.2478
6.48	17118	21434	7.3982	349.56		331.07	273.73	3.6991	18.496
7.02	16949	21540	9.2478	377.31		318.12	201.6	3.6991	22.195
7.56	17023	21782	9.2478	336.62		344.02	201.6	1.8496	20.345
8.1	16846	21368	11.097	358.81		338.47	223.8	0	12.947
8.64	17049	21436	5.5487	305.18		331.07	249.69	3.6991	22.195
9.18	17486	21555	3.6991	327.37		345.87	221.95	1.8496	14.796
9.72	17188	21603	11.097	344.02		349.56	197.9	3.6991	25.894
10.26	17404	21634	11.097	321.82		336.62	205.3	1.8496	16.646
10.8	17550	21980	3.6991	369.91		353.26	234.89	1.8496	20.345
11.34	16994	20983	14.796	327.37		334.77	227.49	1.8496	24.044
11.88	17066	21196	1.8496	312.57		332.92	223.8	3.6991	14.796
12.42	17267	21582	5.5487	327.37		340.32	231.19	5.5487	24.044
12.96	16646	21340	11.097	379.16		319.97	231.19	7.3982	16.646
13.5	16688	21316	9.2478	358.81		334.77	214.55	1.8496	27.743
14.04	17290	21449	7.3982	381.01		334.77	225.65	0	35.141
14.58	17212	21286	11.097	379.16		307.03	209	1.8496	12.947
15.12	17391	21323	3.6991	353.26		332.92	240.44	1.8496	18.496
15.66	16890	21716	3.6991	369.91		308.87	192.35	1.8496	27.743
16.2	17027	20880	3.6991	355.11		299.63	203.45	5.5487	14.796
16.74	17143	21656	7.3982	334.77		323.67	242.29	5.5487	12.947
17.28	17060	21431	7.3982	305.18		360.66	264.49	3.6991	12.947
17.82	17069	21203	9.2478	388.41		327.37	240.44	1.8496	27.743
18.36	17380	21096	9.2478	399.5		295.93	218.25	5.5487	20.345
18.9	17349	21597	3.6991	353.26		255.24	207.15	1.8496	27.743
19.44	17077	21464	3.6991	338.47		336.62	247.84	0	25.894
19.98	17362	21699	7.3982	369.91		342.17	242.29	3.6991	18.496
20.52	17584	21643	7.3982	325.52		314.42	242.29	3.6991	20.345
21.06	17611	21159	3.6991	381.01		292.23	216.4	7.3982	12.947
21.6	17534	21527	7.3982	329.22		305.18	236.74	1.8496	16.646
22.14	17711	21531	5.5487	355.11		332.92	218.25	5.5487	18.496
22.68	17709	21183	7.3982	368.06		281.13	240.44	1.8496	7.3982
23.22	17454	21649	7.3982	340.32		345.87	214.55	7.3982	18.496
23.76	17158	21068	7.3982	392.1		368.06	231.19	1.8496	14.796
24.3	17574	21237	12.947	342.17		393.95	218.25	3.6991	12.947
24.84	17613	21044	3.6991	310.72		325.52	253.39	3.6991	31.442
25.38	17349	21150	3.6991	382.86		314.42	231.19	3.6991	35.141
25.92	17262	21201	5.5487	395.8		336.62	262.64	11.097	22.195
26.46	17365	21140	3.6991	416.15		419.85	275.58	0	25.894
27	17399	21212	9.2478	379.16		390.26	240.44	3.6991	12.947
27.54	17512	21224	9.2478	390.26		332.92	236.74	1.8496	25.894
28.08	17430	21257	16.646	414.3		353.26	218.25	1.8496	29.593
28.62	17580	21392	12.947	314.42		316.27	240.44	1.8496	14.796
29.16	17512	21076	7.3982	377.31		344.02	210.85	3.6991	22.195
29.7	17251	20598	3.6991	349.56		318.12	244.14	5.5487	11.097
30.24	17227	20905	7.3982	395.8		336.62	223.8	1.8496	20.345
30.78	17571	20739	7.3982	305.18		290.38	225.65	3.6991	20.345
31.32	17354	20534	3.6991	381.01		305.18	238.59	1.8496	24.044
31.86	17584	21044	11.097	323.67		342.17	257.09	5.5487	18.496
32.4	17356	21181	20.345	355.11		303.33	258.94	0	31.442
32.94	17826	20510	3.6991	332.92		362.51	234.89	1.8496	25.894
33.48	17182	20489	9.2478	325.52		308.87	194.2	9.2478	24.044
34.02	17020	20249	3.6991	392.1		312.57	199.75	1.8496	18.496
34.56	17253	20648	7.3982	381.01		381.01	236.74	3.6991	14.796
35.1	17389	20238	11.097	412.45		329.22	207.15	3.6991	18.496
35.64	17217	20214	11.097	375.46		316.27	229.34	1.8496	20.345
36.18	17406	20069	11.097	355.11		329.22	225.65	5.5487	27.743
36.72	17508	20521	11.097	334.77		327.37	257.09	0	24.044
37.26	17580	19859	5.5487	355.11		292.23	264.49	0	11.097
37.8	17439	20558	5.5487	358.81		349.56	257.09	1.8496	14.796
38.34	17782	20227	11.097	316.27		316.27	240.44	3.6991	14.796
38.88	17658	19700	11.097	327.37		342.17	240.44	1.8496	14.796
39.42	17915	20021	11.097	345.87		305.18	244.14	1.8496	20.345
39.96	17242	19646	11.097	375.46		310.72	266.34	5.5487	20.345
40.5	17591	19838	12.947	329.22		362.51	236.74	7.3982	33.292
41.04	17467	19816	5.5487	360.66		327.37	231.19	7.3982	27.743
41.58	17552	19483	12.947	316.27		336.62	216.4	1.8496	22.195
42.12	17373	19518	7.3982	344.02		279.28	255.24	5.5487	18.496
42.66	17351	19450	3.6991	397.65		410.6	221.95	1.8496	18.496
43.2	17578	19389	7.3982	388.41		318.12	207.15	5.5487	18.496
43.74	17345	19145	3.6991	344.02		329.22	244.14	1.8496	27.743
44.28	17423	19213	9.2478	351.41		332.92	238.59	1.8496	27.743
44.82	17401	19089	12.947	388.41		336.62	257.09	3.6991	25.894
45.36	17443	18941	11.097	338.47		273.73	218.25	1.8496	20.345
45.9	17674	19302	7.3982	319.97		379.16	245.99	3.6991	18.496
46.44	17526	19111	1.8496	327.37		360.66	249.69	7.3982	27.743
46.98	17180	18949	9.2478	353.26		325.52	233.04	3.6991	27.743
47.52	17388	18834	1.8496	329.22		327.37	260.79	1.8496	22.195
48.06	17541	19204	16.646	366.21		321.82	253.39	7.3982	16.646
48.6	17756	19431	5.5487	351.41		332.92	264.49	5.5487	22.195
49.14	17426	19185	14.796	340.32		327.37	196.05	1.8496	35.141
49.68	17458	18682	5.5487	382.86		345.87	238.59	0	24.044
50.22	17804	18882	5.5487	384.71		305.18	275.58	7.3982	9.2478
50.76	17560	19058	7.3982	321.82		338.47	260.79	1.8496	25.894
51.3	17600	18899	11.097	360.66		303.33	218.25	3.6991	24.044
51.84	17508	18695	7.3982	368.06		329.22	236.74	5.5487	24.044
52.38	17221	19202	14.796	382.86		368.06	253.39	3.6991	11.097
52.92	17445	18664	5.5487	334.77		321.82	251.54	3.6991	11.097
53.46	17247	18928	7.3982	373.61		358.81	234.89	3.6991	25.894
54	17267	18910	7.3982	349.56		377.31	212.7	3.6991	14.796
54.54	17550	18975	9.2478	373.61		332.92	227.49	1.8496	20.345
55.08	17942	18884	7.3982	423.55		331.07	244.14	5.5487	16.646
55.62	17384	19037	7.3982	381.01		270.03	240.44	5.5487	12.947
56.16	17610	18828	5.5487	323.67		321.82	245.99	7.3982	14.796
56.7	17598	18631	9.2478	358.81		301.48	196.05	3.6991	18.496
57.24	17913	19071	7.3982	373.61		312.57	260.79	1.8496	38.841
57.78	17377	18869	12.947	362.51		332.92	214.55	3.6991	25.894
58.32	17471	18721	14.796	366.21		362.51	257.09	5.5487	22.195
58.86	17447	18854	5.5487	307.03		319.97	216.4	5.5487	16.646
59.4	17798	18608	11.097	356.96		292.23	271.88	1.8496	20.345
59.94	17328	18684	9.2478	425.4		336.62	225.65	0	16.646
60.48	17251	18734	9.2478	393.95		336.62	207.15	1.8496	12.947
61.02	17652	18767	12.947	366.21		360.66	234.89	3.6991	22.195
61.56	17458	18675	5.5487	353.26		286.68	244.14	3.6991	27.743
62.1	17856	18980	3.6991	349.56		323.67	255.24	7.3982	11.097
62.64	17328	18710	11.097	375.46		305.18	245.99	3.6991	22.195
63.18	17389	19054	3.6991	334.77		321.82	231.19	11.097	24.044
63.72	17404	18690	11.097	331.07		282.98	238.59	7.3982	31.442
64.26	17802	18512	11.097	384.71		310.72	214.55	1.8496	14.796
64.8	17567	19095	9.2478	384.71		340.32	229.34	5.5487	22.195
65.34	17717	18963	9.2478	347.72		319.97	225.65	3.6991	11.097
65.88	17793	18751	1.8496	336.62		382.86	234.89	5.5487	20.345
66.42	17325	18631	11.097	369.91		375.46	238.59	5.5487	14.796
66.96	17611	19030	18.496	305.18		345.87	240.44	3.6991	16.646
67.5	17447	18902	11.097	360.66		314.42	266.34	1.8496	18.496
68.04	17560	18717	16.646	355.11		308.87	238.59	11.097	20.345
68.58	17340	18976	7.3982	360.66		319.97	245.99	3.6991	20.345
69.12	17567	18767	3.6991	384.71		281.13	231.19	9.2478	22.195
69.66	17650	19015	12.947	369.91		347.72	282.98	7.3982	20.345
70.2	17778	18836	11.097	342.17		331.07	281.13	3.6991	27.743
70.74	17719	18945	5.5487	334.77		305.18	270.03	5.5487	14.796
71.28	17795	18878	7.3982	375.46		356.96	236.74	0	22.195
71.82	17634	18915	9.2478	388.41		344.02	257.09	1.8496	18.496
72.36	17467	18808	9.2478	364.36		336.62	262.64	7.3982	24.044
72.9	17367	18908	1.8496	347.72		331.07	207.15	5.5487	14.796
73.44	17706	19171	5.5487	366.21		312.57	271.88	5.5487	22.195
73.98	17974	18714	9.2478	366.21		294.08	225.65	3.6991	16.646
74.52	17782	18976	11.097	325.52		379.16	240.44	1.8496	22.195
75.06	17608	19026	5.5487	393.95		338.47	257.09	3.6991	38.841
75.6	17935	18603	16.646	355.11		329.22	247.84	5.5487	24.044
76.14	17809	18799	9.2478	286.68		327.37	251.54	5.5487	24.044
76.68	17654	18521	9.2478	325.52		351.41	234.89	3.6991	24.044
77.22	17693	18490	12.947	371.76		327.37	255.24	3.6991	35.141
77.76	17759	18773	3.6991	327.37		312.57	207.15	9.2478	14.796
78.3	17586	18756	7.3982	345.87		362.51	227.49	1.8496	29.593
78.84	17708	18965	11.097	340.32		356.96	240.44	11.097	25.894
79.38	17515	18808	7.3982	297.78		336.62	240.44	7.3982	20.345
79.92	17684	19117	11.097	312.57		321.82	238.59	3.6991	24.044
80.46	18074	18647	9.2478	338.47		342.17	242.29	7.3982	27.743
81	17569	19119	14.796	334.77		334.77	271.88	9.2478	22.195
81.54	17826	18989	1.8496	355.11		371.76	310.72	7.3982	24.044
82.08	18066	18712	5.5487	362.51		282.98	255.24	7.3982	27.743
82.62	18007	18821	1.8496	325.52		345.87	270.03	1.8496	27.743
83.16	17763	18738	11.097	323.67		355.11	251.54	0	16.646
83.7	17634	19154	11.097	353.26		321.82	260.79	9.2478	22.195
84.24	17839	19135	11.097	318.12		329.22	268.18	3.6991	33.292
84.78	17613	19300	9.2478	281.13		353.26	271.88	1.8496	33.292
85.32	17789	18889	3.6991	349.56		342.17	268.18	0	25.894
85.86	18018	18932	7.3982	362.51		319.97	258.94	3.6991	24.044
86.4	17963	19097	16.646	312.57		325.52	286.68	5.5487	24.044
86.94	17728	18962	5.5487	351.41		301.48	277.43	11.097	22.195
87.48	17735	18766	9.2478	382.86		388.41	290.38	9.2478	18.496
88.02	18113	19317	3.6991	373.61		338.47	253.39	3.6991	40.69
88.56	17848	19043	5.5487	375.46		334.77	264.49	9.2478	24.044
89.1	17517	19335	7.3982	395.8		384.71	220.1	5.5487	14.796
89.64	17778	19328	7.3982	369.91		327.37	277.43	5.5487	16.646
90.18	18002	19163	5.5487	369.91		310.72	290.38	1.8496	14.796
90.72	18177	19161	9.2478	369.91		342.17	245.99	1.8496	22.195
91.26	18244	19126	1.8496	386.56		319.97	290.38	7.3982	25.894
91.8	17728	19198	9.2478	358.81		307.03	260.79	3.6991	31.442
92.34	18275	19589	11.097	392.1		345.87	242.29	5.5487	25.894
92.88	18185	19380	9.2478	388.41		345.87	247.84	5.5487	27.743
93.42	17843	19100	5.5487	349.56		325.52	247.84	7.3982	12.947
93.96	18087	19224	7.3982	336.62		329.22	277.43	1.8496	24.044
94.5	17811	19676	5.5487	331.07		356.96	233.04	5.5487	25.894
95.04	18233	19441	5.5487	262.64		316.27	268.18	3.6991	35.141
95.58	18076	19259	5.5487	342.17		368.06	262.64	9.2478	31.442
96.12	17989	19300	9.2478	292.23		351.41	225.65	7.3982	31.442
96.66	18081	19459	9.2478	334.77		362.51	258.94	5.5487	33.292
97.2	18283	19417	9.2478	342.17		360.66	268.18	3.6991	25.894
97.74	18287	19814	3.6991	356.96		327.37	255.24	1.8496	11.097
98.28	17846	19644	7.3982	290.38		375.46	270.03	1.8496	20.345
98.82	18185	19566	12.947	355.11		364.36	268.18	1.8496	40.69
99.36	17931	19285	12.947	327.37		345.87	286.68	1.8496	20.345
99.9	18172	19250	9.2478	310.72		334.77	240.44	3.6991	20.345
100.44	17967	19158	5.5487	310.72		342.17	301.48	3.6991	27.743
100.98	17863	19063	5.5487	314.42		373.61	275.58	1.8496	22.195
101.52	18244	19520	7.3982	355.11		351.41	255.24	1.8496	24.044
102.06	18028	19296	7.3982	334.77		358.81	249.69	1.8496	29.593
102.6	18139	19200	16.646	349.56		292.23	251.54	1.8496	27.743
103.14	18372	19145	12.947	373.61		334.77	292.23	7.3982	25.894
103.68	18131	18976	3.6991	362.51		342.17	268.18	5.5487	24.044
104.22	17952	19381	5.5487	334.77		331.07	238.59	3.6991	24.044
104.76	17955	18947	5.5487	364.36		314.42	251.54	3.6991	24.044
105.3	17915	18971	3.6991	301.48		340.32	216.4	3.6991	40.69
105.84	17782	18950	9.2478	321.82		342.17	231.19	9.2478	22.195
106.38	18238	19304	7.3982	340.32		356.96	247.84	5.5487	22.195
106.92	18192	19243	11.097	349.56		312.57	273.73	0	24.044
107.46	18248	19315	12.947	310.72		362.51	282.98	3.6991	29.593
108	18473	19492	11.097	334.77		312.57	260.79	3.6991	24.044
108.54	17959	19350	12.947	377.31		377.31	273.73	9.2478	18.496
109.08	18348	19522	12.947	358.81		327.37	284.83	0	29.593
109.62	18172	19409	5.5487	345.87		314.42	297.78	3.6991	27.743
110.16	18205	19431	3.6991	393.95		358.81	247.84	5.5487	18.496
110.7	18218	19283	3.6991	369.91		386.56	282.98	5.5487	22.195
111.24	18251	19496	7.3982	395.8		327.37	271.88	11.097	18.496
111.78	17983	19696	3.6991	392.1		321.82	238.59	5.5487	22.195
112.32	18427	19520	12.947	401.35		332.92	255.24	5.5487	14.796
112.86	18370	19295	3.6991	369.91		319.97	253.39	5.5487	35.141
113.4	18416	19483	16.646	351.41		332.92	258.94	7.3982	35.141
113.94	18231	19751	18.496	331.07		379.16	255.24	5.5487	20.345
114.48	18542	19668	12.947	399.5		388.41	231.19	1.8496	33.292
115.02	18218	19738	14.796	379.16		379.16	249.69	0	40.69
115.56	18192	19568	7.3982	349.56		353.26	247.84	5.5487	22.195
116.1	18288	19868	7.3982	331.07		351.41	279.28	0	33.292
116.64	18139	19831	20.345	319.97		312.57	271.88	1.8496	24.044
117.18	18133	19307	20.345	342.17		318.12	282.98	0	24.044
117.72	18137	19341	7.3982	270.03		349.56	262.64	3.6991	20.345
118.26	18098	19923	7.3982	405.05		366.21	262.64	3.6991	27.743
118.8	18146	19790	7.3982	301.48		342.17	286.68	3.6991	22.195
119.34	18250	19759	7.3982	364.36		425.4	257.09	1.8496	35.141
119.88	18218	19642	14.796	321.82		349.56	281.13	9.2478	12.947
120.42	18250	19343	3.6991	340.32		338.47	258.94	3.6991	24.044
120.96	18203	19979	14.796	371.76		371.76	273.73	0	29.593
121.5	18531	19481	11.097	307.03		351.41	305.18	3.6991	14.796
122.04	18318	19520	11.097	292.23		340.32	270.03	3.6991	22.195
122.58	18360	19947	11.097	349.56		379.16	273.73	3.6991	35.141
123.12	18311	18795	12.947	270.03		312.57	308.87	3.6991	22.195
123.66	18296	19250	1.8496	353.26		336.62	271.88	3.6991	25.894
124.2	18102	19387	12.947	345.87		356.96	308.87	0	29.593
124.74	18281	19378	3.6991	318.12		373.61	279.28	1.8496	25.894
125.28	18403	19637	14.796	282.98		349.56	234.89	7.3982	29.593
125.82	18231	19143	11.097	319.97		362.51	271.88	1.8496	22.195
126.36	18081	18856	5.5487	281.13		371.76	251.54	3.6991	14.796
126.9	18198	19413	12.947	288.53		334.77	260.79	3.6991	27.743
127.44	18068	19039	11.097	366.21		371.76	292.23	5.5487	25.894
127.98	18360	18830	7.3982	319.97		332.92	295.93	3.6991	31.442
128.52	18196	19202	11.097	345.87		349.56	253.39	11.097	31.442
129.06	18046	19021	1.8496	327.37		386.56	297.78	7.3982	16.646
129.6	17987	19232	12.947	297.78		403.2	319.97	7.3982	29.593
130.14	18305	19063	9.2478	312.57		353.26	290.38	7.3982	20.345
130.68	18394	18677	5.5487	318.12		342.17	316.27	3.6991	24.044
131.22	18059	19442	7.3982	310.72		327.37	295.93	9.2478	22.195
131.76	18250	19189	9.2478	338.47		312.57	268.18	9.2478	18.496
132.3	18364	19202	12.947	334.77		345.87	290.38	5.5487	20.345
132.84	18238	19337	11.097	308.87		360.66	251.54	7.3982	16.646
133.38	18438	19461	5.5487	336.62		360.66	282.98	3.6991	33.292
133.92	18888	19539	7.3982	329.22		345.87	307.03	7.3982	14.796
134.46	18614	19232	7.3982	290.38		355.11	281.13	0	31.442
135	18209	19222	12.947	314.42		356.96	249.69	3.6991	29.593
135.54	18360	19626	18.496	316.27		349.56	240.44	9.2478	29.593
136.08	18279	19452	1.8496	334.77		373.61	284.83	3.6991	29.593
136.62	18270	19150	1.8496	338.47		362.51	255.24	3.6991	12.947
137.16	18318	19265	3.6991	314.42		329.22	288.53	5.5487	33.292
137.7	18201	19566	5.5487	307.03		362.51	282.98	7.3982	20.345
138.24	18318	19626	5.5487	382.86		355.11	312.57	3.6991	29.593
138.78	18349	19892	7.3982	329.22		364.36	277.43	7.3982	11.097
139.32	18109	19405	12.947	336.62		390.26	270.03	3.6991	25.894
139.86	18418	19237	16.646	312.57		334.77	292.23	5.5487	24.044
140.4	18270	20118	14.796	336.62		360.66	260.79	5.5487	24.044
140.94	18455	19505	11.097	323.67		347.72	281.13	5.5487	29.593
141.48	18595	19890	7.3982	349.56		356.96	288.53	5.5487	14.796
142.02	18266	20034	9.2478	305.18		323.67	275.58	3.6991	25.894
142.56	18133	19783	12.947	249.69		332.92	264.49	9.2478	38.841
143.1	18560	20193	14.796	290.38		294.08	271.88	7.3982	27.743
143.64	18753	20580	1.8496	295.93		344.02	284.83	7.3982	33.292
144.18	18701	20058	12.947	282.98		344.02	234.89	7.3982	31.442
144.72	18547	20053	11.097	323.67		331.07	310.72	5.5487	20.345
145.26	18532	19873	3.6991	284.83		334.77	290.38	9.2478	16.646
145.8	18455	19698	11.097	331.07		323.67	301.48	1.8496	29.593
146.34	18242	19947	9.2478	307.03		349.56	282.98	5.5487	40.69
146.88	18244	19923	9.2478	295.93		332.92	266.34	7.3982	18.496
147.42	18237	20232	7.3982	281.13		366.21	331.07	11.097	22.195
147.96	18743	20001	11.097	344.02		351.41	316.27	5.5487	22.195
148.5	18477	19722	12.947	318.12		327.37	257.09	5.5487	14.796
149.04	18399	19925	14.796	325.52		351.41	264.49	3.6991	31.442
149.58	18403	19250	18.496	264.49		329.22	233.04	3.6991	25.894
150.12	18660	19633	22.195	310.72		375.46	251.54	7.3982	24.044
150.66	18579	19626	7.3982	307.03		375.46	353.26	9.2478	29.593
151.2	18422	19602	1.8496	277.43		345.87	288.53	5.5487	25.894
151.74	18401	19603	11.097	301.48		344.02	310.72	7.3982	22.195
152.28	18638	19700	12.947	307.03		366.21	264.49	3.6991	29.593
152.82	18209	19454	3.6991	338.47		336.62	249.69	0	27.743
153.36	18144	19557	7.3982	362.51		388.41	297.78	7.3982	29.593
153.9	18582	19788	5.5487	325.52		344.02	264.49	11.097	22.195
154.44	18769	19463	5.5487	310.72		329.22	253.39	1.8496	25.894
154.98	18396	19381	9.2478	314.42		332.92	245.99	0	31.442
155.52	18577	19380	9.2478	349.56		371.76	282.98	7.3982	31.442
156.06	18619	19348	3.6991	369.91		358.81	255.24	1.8496	27.743
156.6	18416	19546	14.796	342.17		331.07	294.08	9.2478	12.947
157.14	18723	19322	7.3982	323.67		375.46	284.83	5.5487	27.743
157.68	18457	19254	5.5487	273.73		353.26	292.23	5.5487	16.646
158.22	18795	19344	7.3982	319.97		334.77	329.22	3.6991	29.593
158.76	18697	19420	12.947	340.32		307.03	270.03	3.6991	27.743
159.3	18594	19002	11.097	292.23		369.91	271.88	12.947	27.743
159.84	18532	19529	9.2478	338.47		342.17	273.73	7.3982	7.3982
160.38	18747	19509	12.947	282.98		360.66	290.38	9.2478	12.947
160.92	18085	19413	3.6991	338.47		416.15	305.18	5.5487	22.195
161.46	18523	19095	9.2478	290.38		355.11	273.73	9.2478	20.345
162	18586	19065	9.2478	318.12		327.37	336.62	7.3982	20.345
162.54	18688	19383	11.097	310.72		362.51	257.09	3.6991	22.195
163.08	18281	19681	7.3982	319.97		344.02	282.98	7.3982	18.496
163.62	18712	19080	9.2478	332.92		373.61	331.07	3.6991	25.894
164.16	18769	19568	12.947	325.52		386.56	290.38	9.2478	22.195
164.7	18945	19583	18.496	356.96		355.11	288.53	11.097	27.743
165.24	18460	19291	9.2478	321.82		410.6	288.53	3.6991	22.195
165.78	18438	18864	7.3982	353.26		308.87	262.64	5.5487	27.743
166.32	18547	19320	7.3982	288.53		405.05	258.94	9.2478	20.345
166.86	18869	19557	14.796	334.77		356.96	299.63	3.6991	27.743
167.4	18422	19169	12.947	281.13		334.77	297.78	3.6991	22.195
167.94	18590	19738	18.496	332.92		366.21	282.98	14.796	27.743
168.48	18677	19169	11.097	349.56		392.1	273.73	1.8496	27.743
169.02	18529	19409	9.2478	323.67		362.51	307.03	9.2478	31.442
169.56	18712	19198	12.947	388.41		336.62	281.13	7.3982	24.044
170.1	18172	18888	11.097	340.32		321.82	312.57	11.097	22.195
170.64	18431	19455	12.947	358.81		318.12	277.43	1.8496	20.345
171.18	18788	19250	3.6991	336.62		327.37	275.58	9.2478	18.496
171.72	18560	19156	9.2478	360.66		366.21	329.22	7.3982	27.743
172.26	18481	19180	12.947	369.91		356.96	282.98	7.3982	14.796
172.8	18582	19145	20.345	329.22		345.87	273.73	7.3982	24.044
173.34	18893	19121	9.2478	366.21		364.36	282.98	3.6991	18.496
173.88	18250	19202	3.6991	329.22		392.1	273.73	5.5487	18.496
174.42	18647	18878	9.2478	349.56		377.31	294.08	3.6991	24.044
174.96	18150	18906	9.2478	366.21		331.07	292.23	5.5487	20.345
175.5	18634	18891	18.496	338.47		388.41	275.58	3.6991	25.894
176.04	18734	19087	3.6991	362.51		332.92	297.78	3.6991	16.646
176.58	18603	19069	9.2478	329.22		388.41	242.29	5.5487	24.044
177.12	18682	18923	5.5487	318.12		371.76	255.24	7.3982	18.496
177.66	18814	18420	11.097	319.97		362.51	288.53	3.6991	31.442
178.2	18925	19058	9.2478	351.41		358.81	327.37	7.3982	20.345
178.74	18769	18669	5.5487	303.33		358.81	292.23	5.5487	29.593
179.28	18668	18845	7.3982	314.42		421.7	301.48	1.8496	38.841
179.82	18851	18780	3.6991	308.87		453.14	327.37	7.3982	14.796
180.36	18621	18882	5.5487	344.02		353.26	249.69	5.5487	18.496
180.9	18507	18710	5.5487	375.46		360.66	273.73	1.8496	22.195
181.44	18658	18385	9.2478	319.97		375.46	318.12	3.6991	33.292
181.98	18338	18806	3.6991	323.67		406.9	310.72	7.3982	33.292
182.52	18871	18932	9.2478	368.06		390.26	277.43	7.3982	25.894
183.06	18621	18503	11.097	338.47		338.47	264.49	9.2478	33.292
183.6	19135	18475	12.947	312.57		368.06	273.73	3.6991	29.593
184.14	18309	18368	9.2478	377.31		327.37	268.18	3.6991	5.5487
184.68	18534	18827	7.3982	331.07		386.56	255.24	5.5487	27.743
185.22	18536	18547	1.8496	338.47		342.17	271.88	5.5487	20.345
185.76	18714	18349	14.796	318.12		403.2	270.03	3.6991	31.442
186.3	19084	18660	11.097	397.65		366.21	270.03	7.3982	24.044
186.84	18760	18422	9.2478	321.82		336.62	271.88	1.8496	14.796
187.38	18373	18608	5.5487	327.37		362.51	305.18	9.2478	20.345
187.92	18705	18749	3.6991	321.82		386.56	275.58	1.8496	31.442
188.46	18806	18213	12.947	297.78		373.61	318.12	7.3982	33.292
189	18788	18664	12.947	294.08		377.31	286.68	5.5487	31.442
189.54	18680	18754	5.5487	312.57		384.71	340.32	3.6991	38.841
190.08	18697	18919	5.5487	332.92		442.04	295.93	1.8496	24.044
190.62	18843	18734	7.3982	331.07		403.2	297.78	5.5487	16.646
191.16	18766	18575	7.3982	329.22		360.66	318.12	3.6991	25.894
191.7	18793	18743	16.646	342.17		382.86	307.03	11.097	31.442
192.24	18477	18614	7.3982	319.97		369.91	307.03	0	35.141
192.78	18926	18026	9.2478	325.52		347.72	270.03	3.6991	27.743
193.32	18695	18436	3.6991	327.37		408.75	299.63	12.947	24.044
193.86	18893	18612	3.6991	364.36		342.17	310.72	3.6991	25.894
194.4	18950	18372	9.2478	332.92		342.17	268.18	0	22.195
194.94	18642	18658	9.2478	321.82		338.47	286.68	5.5487	29.593
195.48	19182	18873	7.3982	355.11		430.95	323.67	1.8496	27.743
196.02	18547	18299	7.3982	369.91		399.5	268.18	7.3982	27.743
196.56	18686	18377	7.3982	349.56		355.11	294.08	5.5487	9.2478
197.1	18532	18287	12.947	312.57		336.62	284.83	3.6991	35.141
197.64	18664	18013	9.2478	369.91		364.36	295.93	3.6991	16.646
198.18	18984	18581	20.345	314.42		386.56	266.34	9.2478	20.345
198.72	19119	18296	14.796	342.17		371.76	277.43	7.3982	24.044
199.26	18889	18061	9.2478	342.17		358.81	327.37	7.3982	14.796
199.8	18705	18397	11.097	295.93		316.27	249.69	7.3982	31.442
200.34	18695	18479	16.646	368.06		388.41	297.78	11.097	29.593
200.88	18425	18052	9.2478	332.92		358.81	273.73	7.3982	25.894
201.42	18662	18181	5.5487	316.27		414.3	275.58	3.6991	20.345
201.96	18701	18113	1.8496	323.67		360.66	279.28	5.5487	25.894
202.5	18699	18540	5.5487	303.33		375.46	312.57	5.5487	38.841
203.04	19002	18409	5.5487	375.46		403.2	271.88	1.8496	35.141
203.58	18982	18357	3.6991	334.77		368.06	305.18	3.6991	36.991
204.12	18989	18068	7.3982	356.96		369.91	268.18	7.3982	33.292
204.66	18747	18111	7.3982	356.96		399.5	295.93	9.2478	36.991
205.2	18658	17933	9.2478	338.47		336.62	286.68	1.8496	36.991
205.74	18986	17702	5.5487	319.97		393.95	294.08	3.6991	24.044
206.28	18730	17756	3.6991	338.47		368.06	321.82	12.947	14.796
206.82	18799	18090	12.947	307.03		386.56	301.48	5.5487	22.195
207.36	18819	18353	12.947	314.42		399.5	282.98	7.3982	16.646
207.9	19050	18510	11.097	329.22		318.12	325.52	1.8496	31.442
208.44	19204	18477	7.3982	290.38		344.02	290.38	9.2478	27.743
208.98	18808	18444	9.2478	371.76		377.31	295.93	3.6991	20.345
209.52	19215	18823	7.3982	358.81		360.66	303.33	7.3982	31.442
210.06	18971	18758	1.8496	325.52		364.36	292.23	3.6991	29.593
210.6	18741	17968	1.8496	305.18		403.2	297.78	7.3982	31.442
211.14	19185	18277	5.5487	318.12		408.75	314.42	9.2478	22.195
211.68	18545	18200	3.6991	294.08		377.31	288.53	14.796	27.743
212.22	19113	18305	9.2478	329.22		401.35	338.47	14.796	29.593
212.76	18840	18536	7.3982	305.18		397.65	342.17	1.8496	24.044
213.3	18767	18505	14.796	307.03		384.71	327.37	5.5487	38.841
213.84	19150	18599	12.947	351.41		377.31	301.48	1.8496	24.044
214.38	18803	18201	18.496	303.33		364.36	264.49	3.6991	27.743
214.92	18697	18629	7.3982	325.52		377.31	277.43	5.5487	42.54
215.46	18603	18592	5.5487	279.28		342.17	294.08	16.646	35.141
216	18788	18875	11.097	308.87		399.5	277.43	9.2478	31.442
216.54	19078	19328	3.6991	312.57		344.02	301.48	3.6991	20.345
217.08	18906	18449	7.3982	270.03		377.31	325.52	5.5487	24.044
217.62	19141	18481	5.5487	290.38		342.17	244.14	3.6991	18.496
218.16	18692	18647	12.947	297.78		412.45	305.18	11.097	14.796
218.7	19263	18442	7.3982	282.98		349.56	255.24	3.6991	20.345
219.24	19193	18780	5.5487	338.47		371.76	301.48	18.496	33.292
219.78	19185	18938	5.5487	307.03		331.07	288.53	3.6991	22.195
220.32	18690	18869	9.2478	345.87		379.16	277.43	3.6991	20.345
220.86	19169	19121	11.097	362.51		414.3	282.98	9.2478	22.195
221.4	18965	18555	5.5487	329.22		368.06	338.47	1.8496	38.841
221.94	19108	18897	5.5487	351.41		399.5	290.38	11.097	18.496
222.48	18808	19082	7.3982	332.92		425.4	290.38	3.6991	20.345
223.02	18987	18536	12.947	332.92		351.41	260.79	9.2478	24.044
223.56	18856	18740	9.2478	344.02		388.41	327.37	7.3982	24.044
224.1	18960	19013	9.2478	340.32		429.1	295.93	14.796	20.345
224.64	19126	18516	9.2478	351.41		356.96	319.97	3.6991	11.097
225.18	19087	18316	9.2478	301.48		381.01	323.67	1.8496	33.292
225.72	19047	18618	9.2478	319.97		381.01	314.42	3.6991	14.796
226.26	19034	18753	3.6991	325.52		371.76	279.28	9.2478	22.195
226.8	18871	18471	11.097	355.11		408.75	305.18	7.3982	24.044
227.34	18923	19145	12.947	310.72		405.05	271.88	7.3982	20.345
227.88	19272	18294	5.5487	301.48		436.49	260.79	14.796	22.195
228.42	19544	19250	9.2478	327.37		351.41	307.03	7.3982	22.195
228.96	19221	18340	5.5487	308.87		338.47	325.52	5.5487	36.991
229.5	19159	18438	9.2478	312.57		388.41	319.97	7.3982	24.044
230.04	19341	18446	7.3982	284.83		358.81	270.03	5.5487	16.646
230.58	19433	18758	3.6991	295.93		349.56	282.98	9.2478	27.743
231.12	19058	18656	1.8496	321.82		408.75	371.76	5.5487	16.646
231.66	19073	19052	9.2478	342.17		429.1	290.38	11.097	31.442
232.2	19148	18666	12.947	356.96		401.35	319.97	3.6991	44.389
232.74	19122	18100	11.097	321.82		382.86	264.49	7.3982	18.496
233.28	19052	18612	11.097	281.13		393.95	292.23	7.3982	24.044
233.82	18814	18314	14.796	251.54		371.76	266.34	3.6991	29.593
234.36	19143	18499	11.097	286.68		371.76	312.57	9.2478	29.593
234.9	18950	18483	11.097	297.78		366.21	288.53	11.097	27.743
235.44	19061	18211	9.2478	262.64		390.26	308.87	3.6991	40.69
235.98	19056	18501	5.5487	295.93		377.31	323.67	5.5487	35.141
236.52	19354	18486	12.947	295.93		364.36	308.87	5.5487	18.496
237.06	19293	18455	5.5487	295.93		368.06	312.57	3.6991	27.743
237.6	19274	18394	7.3982	294.08		356.96	297.78	9.2478	48.088
238.14	18962	18886	5.5487	292.23		377.31	316.27	7.3982	33.292
238.68	19463	18325	11.097	332.92		421.7	286.68	3.6991	18.496
239.22	19182	18390	14.796	292.23		375.46	301.48	5.5487	35.141
239.76	18762	18442	5.5487	368.06		379.16	316.27	9.2478	27.743
240.3	18836	18388	5.5487	345.87		395.8	327.37	0	38.841
240.84	19191	18262	12.947	332.92		397.65	288.53	7.3982	25.894
241.38	19134	18151	20.345	307.03		399.5	318.12	0	27.743
241.92	18956	18357	7.3982	336.62		436.49	323.67	5.5487	49.938
242.46	19243	18090	5.5487	364.36		410.6	332.92	3.6991	27.743
243	19041	18658	7.3982	338.47		386.56	258.94	12.947	18.496
243.54	19069	18179	14.796	373.61		393.95	299.63	3.6991	24.044
244.08	19202	18161	14.796	308.87		390.26	368.06	9.2478	25.894
244.62	19058	18096	7.3982	325.52		386.56	297.78	3.6991	27.743
245.16	18930	18187	3.6991	340.32		390.26	307.03	1.8496	35.141
245.7	19311	18410	7.3982	384.71		440.19	349.56	5.5487	25.894
246.24	19067	18636	7.3982	321.82		390.26	319.97	5.5487	27.743
246.78	18778	17717	9.2478	325.52		425.4	301.48	5.5487	24.044
247.32	18736	18041	16.646	334.77		366.21	327.37	9.2478	20.345
247.86	19230	18031	5.5487	327.37		390.26	332.92	3.6991	24.044
248.4	19110	17839	12.947	329.22		456.84	323.67	3.6991	22.195
248.94	18999	17989	11.097	253.39		432.79	288.53	5.5487	33.292
249.48	19363	18309	9.2478	344.02		345.87	325.52	9.2478	31.442
250.02	18952	18203	11.097	277.43		384.71	334.77	3.6991	35.141
250.56	19030	18026	5.5487	308.87		395.8	345.87	3.6991	20.345
251.1	19004	17983	14.796	294.08		393.95	351.41	7.3982	27.743
251.64	18997	17672	5.5487	316.27		449.44	305.18	3.6991	29.593
252.18	18941	17902	7.3982	253.39		360.66	356.96	9.2478	25.894
252.72	19117	17909	9.2478	299.63		373.61	331.07	3.6991	25.894
253.26	19113	17795	9.2478	266.34		416.15	342.17	3.6991	40.69
253.8	18910	17970	5.5487	307.03		410.6	310.72	1.8496	35.141
254.34	19071	18105	7.3982	277.43		366.21	286.68	9.2478	22.195
254.88	19015	17593	9.2478	279.28		405.05	325.52	5.5487	22.195
255.42	18834	17905	12.947	290.38		440.19	310.72	3.6991	44.389
255.96	19039	17591	9.2478	282.98		430.95	305.18	5.5487	36.991
256.5	19261	17893	5.5487	282.98		414.3	308.87	5.5487	35.141
257.04	18865	17266	3.6991	223.8		432.79	355.11	5.5487	27.743
257.58	19200	17512	7.3982	244.14		401.35	290.38	9.2478	33.292
258.12	18901	17569	7.3982	295.93		462.39	323.67	7.3982	42.54
258.66	18880	17728	9.2478	277.43		438.34	318.12	12.947	29.593
259.2	18926	17796	1.8496	247.84		449.44	310.72	9.2478	24.044
259.74	18814	17438	7.3982	288.53		442.04	279.28	3.6991	27.743
260.28	18851	17565	5.5487	260.79		438.34	314.42	5.5487	22.195
260.82	19122	17502	9.2478	233.04		362.51	334.77	9.2478	36.991
261.36	19065	17155	3.6991	260.79		419.85	319.97	3.6991	31.442
261.9	18864	17336	11.097	209		401.35	332.92	5.5487	27.743
262.44	19169	17499	9.2478	258.94		373.61	342.17	5.5487	25.894
262.98	19163	17243	9.2478	238.59		440.19	345.87	11.097	24.044
263.52	19193	17463	16.646	227.49		497.53	305.18	5.5487	27.743
264.06	19012	17447	7.3982	236.74		401.35	334.77	3.6991	31.442
264.6	18854	17219	5.5487	264.49		397.65	338.47	12.947	25.894
265.14	18902	17487	9.2478	266.34		440.19	336.62	9.2478	48.088
265.68	19444	17576	9.2478	273.73		419.85	329.22	5.5487	33.292
266.22	19171	17569	7.3982	266.34		414.3	351.41	12.947	22.195
266.76	19182	17319	1.8496	270.03		451.29	332.92	5.5487	33.292
267.3	18967	17343	9.2478	247.84		423.55	334.77	1.8496	42.54
267.84	19276	17310	14.796	234.89		386.56	356.96	5.5487	27.743
268.38	19073	17304	14.796	268.18		430.95	318.12	9.2478	35.141
268.92	18756	17223	9.2478	284.83		369.91	303.33	12.947	36.991
269.46	18581	17365	7.3982	240.44		462.39	334.77	9.2478	40.69
270	18865	17182	11.097	253.39		440.19	292.23	5.5487	20.345
270.54	18832	17232	14.796	218.25		466.09	344.02	5.5487	38.841
271.08	19043	16996	5.5487	247.84		442.04	325.52	14.796	20.345
271.62	18915	16981	0	273.73		443.89	379.16	12.947	27.743
272.16	18984	17386	5.5487	223.8		388.41	360.66	3.6991	27.743
272.7	18834	17234	9.2478	223.8		425.4	375.46	5.5487	31.442
273.24	18684	17075	3.6991	284.83		436.49	292.23	5.5487	22.195
273.78	19237	17325	5.5487	236.74		425.4	377.31	11.097	31.442
274.32	19172	17223	14.796	238.59		427.25	355.11	14.796	40.69
274.86	18612	16664	1.8496	255.24		414.3	308.87	3.6991	25.894
275.4	19108	17247	9.2478	244.14		414.3	316.27	1.8496	36.991
275.94	18827	17066	7.3982	270.03		429.1	297.78	5.5487	25.894
276.48	19060	16983	14.796	279.28		397.65	301.48	9.2478	49.938
277.02	19012	17401	7.3982	251.54		399.5	382.86	0	14.796
277.56	19126	16631	9.2478	253.39		440.19	307.03	3.6991	35.141
278.1	18436	17162	9.2478	231.19		427.25	390.26	1.8496	29.593
278.64	18980	16553	3.6991	218.25		397.65	297.78	3.6991	42.54
279.18	19049	16925	7.3982	295.93		488.28	344.02	7.3982	27.743
279.72	18808	16670	11.097	297.78		412.45	336.62	7.3982	36.991
280.26	18884	16670	11.097	242.29		434.64	305.18	1.8496	38.841
280.8	18692	16455	7.3982	253.39		386.56	303.33	7.3982	36.991
281.34	18847	16581	7.3982	240.44		369.91	310.72	11.097	36.991
281.88	18836	16992	1.8496	238.59		410.6	325.52	3.6991	22.195
282.42	18740	16344	9.2478	231.19		475.33	336.62	3.6991	31.442
282.96	19095	16548	5.5487	201.6		397.65	284.83	7.3982	38.841
283.5	19082	17260	9.2478	255.24		473.48	355.11	7.3982	24.044
284.04	18847	16454	7.3982	257.09		429.1	327.37	7.3982	20.345
284.58	19204	16727	0	223.8		429.1	334.77	3.6991	46.239
285.12	18947	16873	11.097	264.49		469.79	345.87	9.2478	29.593
285.66	19258	16731	3.6991	257.09		351.41	382.86	7.3982	25.894
286.2	19367	16688	9.2478	257.09		419.85	303.33	3.6991	38.841
286.74	18908	16922	1.8496	270.03		453.14	314.42	1.8496	16.646
287.28	19039	16942	16.646	251.54		436.49	349.56	7.3982	24.044
287.82	19134	16970	3.6991	270.03		454.99	342.17	12.947	16.646
288.36	19071	16799	9.2478	266.34		430.95	371.76	9.2478	25.894
288.9	18791	16694	5.5487	262.64		447.59	377.31	12.947	44.389
289.44	19208	16607	16.646	251.54		381.01	406.9	1.8496	42.54
289.98	19111	16374	20.345	210.85		438.34	373.61	11.097	31.442
290.52	19110	16955	16.646	240.44		475.33	406.9	11.097	36.991
291.06	19252	16873	5.5487	214.55		414.3	321.82	12.947	38.841
291.6	19246	16851	1.8496	238.59		423.55	353.26	7.3982	36.991
292.14	18697	16542	7.3982	236.74		464.24	345.87	16.646	29.593
292.68	19189	16931	7.3982	210.85		393.95	366.21	5.5487	25.894
293.22	19187	16942	9.2478	264.49		430.95	332.92	5.5487	40.69
293.76	18930	16894	12.947	264.49		414.3	375.46	9.2478	35.141
294.3	19017	16750	3.6991	218.25		414.3	351.41	5.5487	48.088
294.84	19043	17086	9.2478	264.49		410.6	393.95	7.3982	16.646
295.38	19080	16494	7.3982	210.85		434.64	323.67	1.8496	40.69
295.92	18895	17090	5.5487	301.48		427.25	366.21	7.3982	27.743
296.46	19110	16986	1.8496	240.44		447.59	375.46	9.2478	38.841
297	19008	16762	14.796	282.98		460.54	331.07	0	27.743
297.54	19422	17094	3.6991	245.99		403.2	327.37	5.5487	42.54
298.08	19555	16984	9.2478	236.74		414.3	307.03	5.5487	42.54
298.62	18747	16740	9.2478	249.69		466.09	332.92	11.097	36.991
299.16	19269	17003	9.2478	238.59		418	331.07	14.796	44.389
299.7	19091	16894	1.8496	260.79		421.7	342.17	7.3982	35.141
